# Supplementary material
Source: PubMed Central journal article supplement (PMC10245286)
Supplement: jama-e239106-s003.pdf [file jama-e239106-s003.pdf]

## Data Sharing Statement

### Data

**Data available:** Yes

**Data types:** Deidentified participant data

**How to access data:** [https://clinicaltrials.gov/ct2/show/NCT03443869?  
term=NCT03443869&draw=2&rank=1](https://clinicaltrials.gov/ct2/show/NCT03443869?term=NCT03443869&draw=2&rank=1)

**When available:** With publication

### Supporting Documents

**Document types:** None

### Additional Information

**Who can access the data:** Anyone upon request

**Types of analyses:** For a specified purpose

**Mechanisms of data availability:** Engagezone.merck.com
